# Supplementary material for: Identifying Biological Network Structure, Predicting Network Behavior, and Classifying Network State With High Dimensional Model Representation (HDMR)
Source: PubMed Central journal article supplement (PMC3377689; doi:10.1371/journal.pone.0037664), 2012-06-18

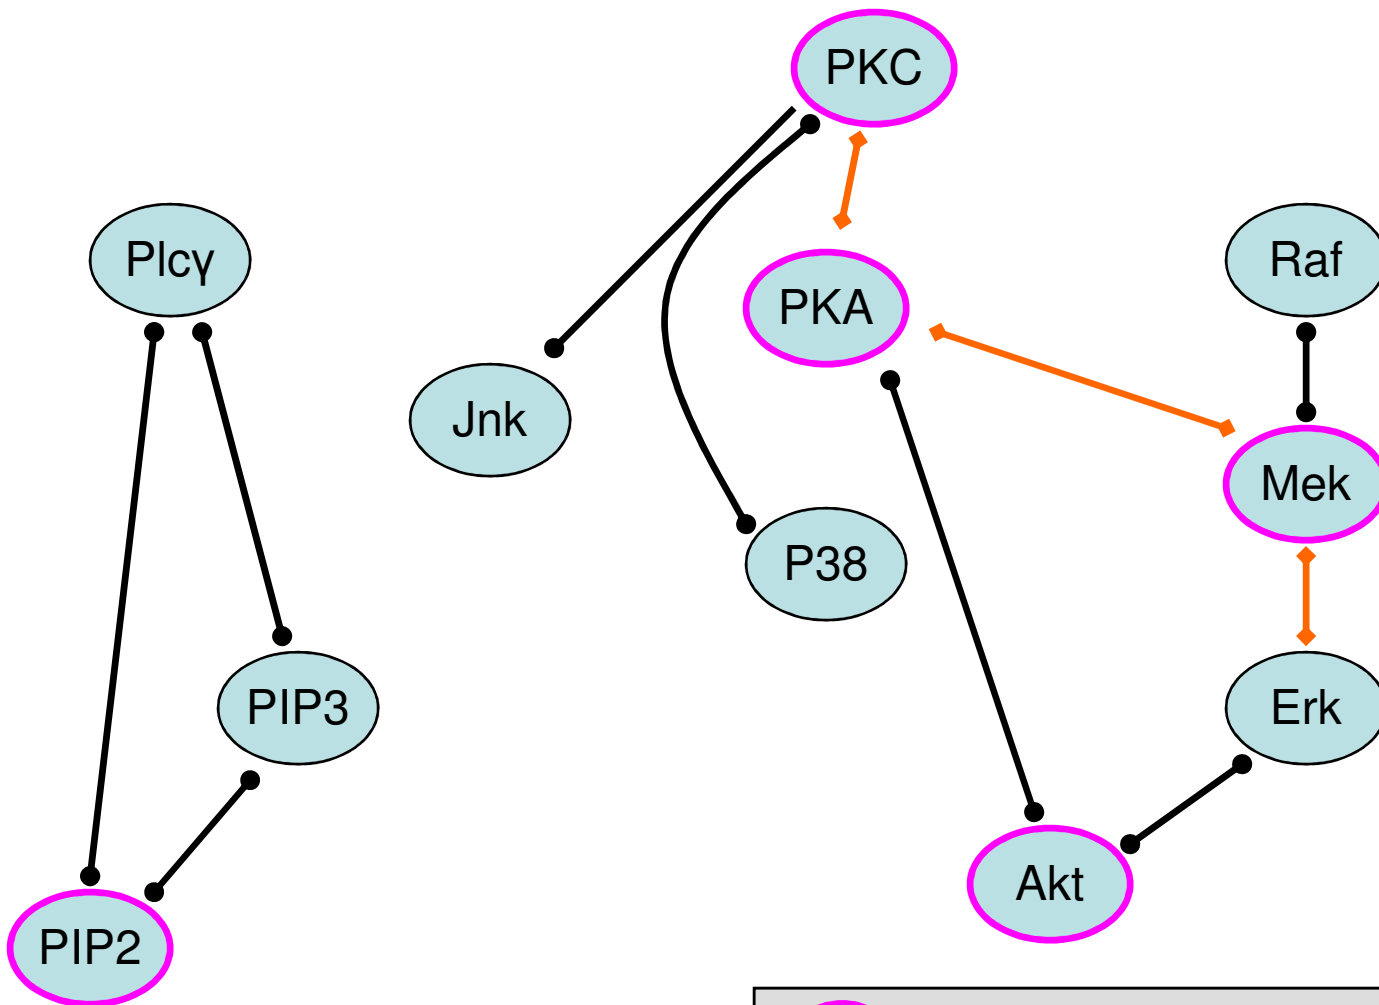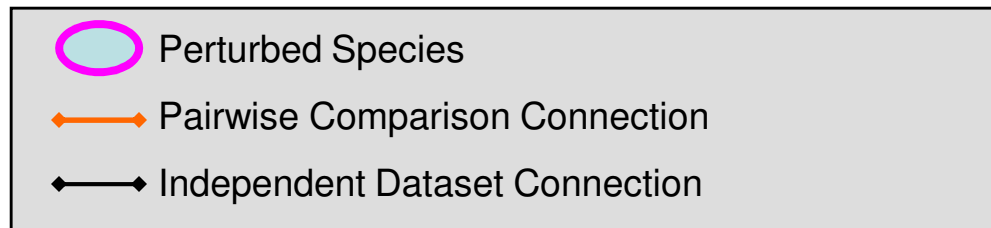

Supplement: pone.0037664.s005.pdf [file pone.0037664.s005.pdf]
