# Supplementary material for: Identifying Biological Network Structure, Predicting Network Behavior, and Classifying Network State With High Dimensional Model Representation (HDMR)
Source: PubMed Central journal article supplement (PMC3377689; doi:10.1371/journal.pone.0037664), 2012-06-18
Supplement: pone.0037664.s008.pdf [file pone.0037664.s008.pdf]

**Table S1: Test Model Coefficients.**

| $i$ | $\alpha_i$ | $a_i$ | $b_i$ | $c_i$ |
|-----|------------|-------|-------|-------|
| 1   | 40.0       | 3     | 0     | 1     |
| 2   | 10.0       | 2     | 2     | 1     |
| 3   | 10.0       | -3    | -4    | 1     |
| 4   | 20.0       | -1    | -1    | -1    |
| 5   | 0.1        | 5     | 3     | 0.1   |
| 6   | 0.6        | 7     | 7     | 1     |
| 7   | 0.5        | 3     | 1.5   | 2     |
| 8   | 0.05       | 1     | 2     | 3     |
| 9   | 0.0        | 3     | 1     | 1     |
| 10  | 0.01       | 2     | 1     | 2     |

The only non-zero second-order coefficient is given by  $\beta_{2,5} = 20.0$ .  $\alpha_9 = 10.0$  for the model condition with a direct connection to  $x_9$ .
