# Supplementary material for: Identifying Biological Network Structure, Predicting Network Behavior, and Classifying Network State With High Dimensional Model Representation (HDMR)
Source: PubMed Central journal article supplement (PMC3377689; doi:10.1371/journal.pone.0037664), 2012-06-18
Supplement: pone.0037664.s009.pdf [file pone.0037664.s009.pdf]

**Table S2: Perturbative conditions and their associated effects.**

| Data set Employed | Reagent         | Biological Effect            |
|-------------------|-----------------|------------------------------|
| $d_1-d_7$         | Anti-CD3/CD28   | General T-cell activation    |
| $d_2$             | ICAM-2          | General Signaling Activation |
| $d_3$             | AKT Inhibitor   | AKT Inhibition               |
| $d_4$             | G06976          | PKC Inhibition               |
| $d_5$             | Psitectorigenin | PIP2 Inhibition              |
| $d_6$             | U0126           | Mek1, Mek2 Inhibition        |
| $d_7$             | LY294002        | Akt Inhibition               |
| $d_8$             | PMA             | PKC activation               |
| $d_9$             | $\beta$ 2cAMP   | PKA activation               |

Nine total data sets were used in the RS-HDMR analyses, each describing the network under a different perturbative condition, reported in more detail by Sachs et al., 2005. General stimulatory agents (Anti-CD3/CD28) were used to activate T cells and induce proliferation in all but two of the data sets.
